# Supplementary material for: Natural Killer Cell Assessment in Peripheral Circulation and Bronchoalveolar Lavage Fluid of Patients with Severe Sepsis: A Case Control Study
Source: PubMed Central journal article supplement (PMC5372632; doi:10.3390/ijms18030616), 2017-03-12

# Supplementary Materials: Natural Killer Cell Assessment in Peripheral Circulation and Bronchoalveolar Lavage Fluid of Patients with Severe Sepsis: A Case Control Study

Paulo Souza-Fonseca-Guimaraes, Fernando Guimaraes, Caroline Natânia De Souza-Araujo, Lidiane Maria Boldrini Leite, Alexandra Cristina Senegaglia, Anita Nishiyama and Fernando Souza-Fonseca-Guimaraes

## Supplementary Figure 1

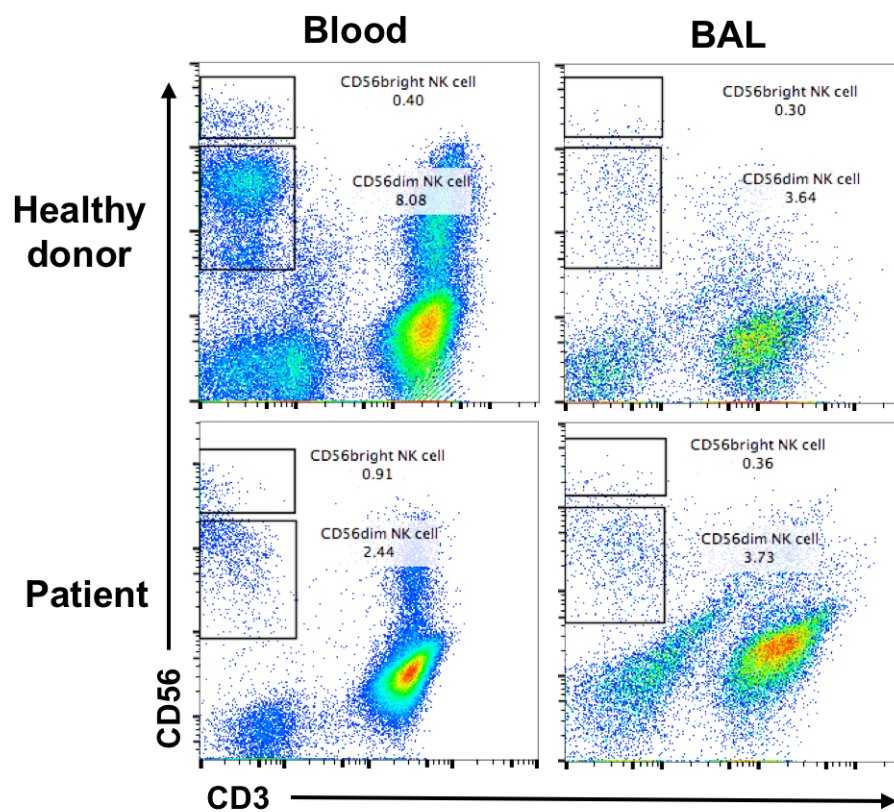

# Supplementary Figure 2

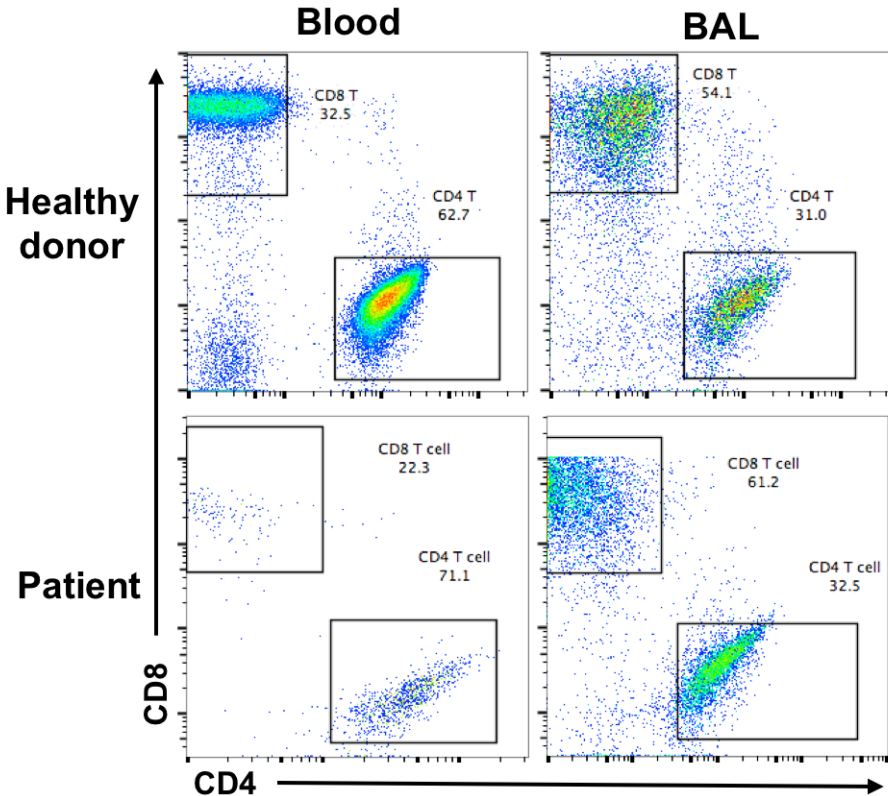

Supplement: ijms-18-00616-s001.pdf [file ijms-18-00616-s001.pdf]
